# Supplementary material
Source: HighWire-hosted journal article supplement (https://www.cmajopen.ca/highwire/filestream/90366/field_highwire_adjunct_files/0/open-2022-0168-1-at.pdf)
Supplement: open-2022-0168-1-at.pdf [file open-2022-0168-1-at.pdf]

## Appendix 1: Demographic forms and interview guides

### Administrator Demographic Form

1. What is your age: \_\_\_\_\_
  
2. What is your gender: \_\_\_\_\_
  - Female
  - Intersex
  - Male
  - Trans – Female to Male
  - Trans – Male to Female
  - Other (please specify): \_\_\_\_\_
  - Prefer not to answer
  - Don't know
  
3. Which of the following best describes your racial or ethnic group? Check ONE only.
  - Asian – East (e.g., Chinese, Japanese, Korean)
  - Asian – South (e.g., Indian, Pakistani, Sri Lankan)
  - Asian – South East (e.g., Malaysian, Filipino, Vietnamese)
  - Black – African (e.g., Ghanaian, Kenyan, Somali)
  - Black – Caribbean (e.g., Barbadian, Jamaican)
  - Black – North American (e.g., Canadian, American)
  - First Nations
  - Indian – Caribbean (e.g., Guyanese with origins in India)
  - Indigenous/Aboriginal – *not included elsewhere*
  - Inuit
  - Latin American (e.g., Argentinean, Chilean, Salvadoran)
  - Métis
  - Middle Eastern (e.g., Egyptian, Iranian, Lebanese)
  - White – European (e.g., English, Italian, Portuguese, Russian)
  - Mixed heritage (e.g., Black – African and White – North American) (Please specify): \_\_\_\_\_
  - Other(s) (Please specify): \_\_\_\_\_
  - Prefer not to answer
  - Do not know
  
4. What is your first language (Mother tongue)?
  - a. English
  - b. French
  - c. Other (Please specify): \_\_\_\_\_
  
5. What is your religious or spiritual affiliation? Check ONE only.

|                                                                          |                                           |
|--------------------------------------------------------------------------|-------------------------------------------|
| <input type="radio"/> I do not have a religious or spiritual affiliation | <input type="radio"/> Native Spirituality |
| <input type="radio"/> Animism or Shamanism                               | <input type="radio"/> Pagan               |
| <input type="radio"/> Atheism                                            | <input type="radio"/> Protestant          |

- Baha'i Faith
  - Buddhism
  - Christian – *not included elsewhere*
  - Christian Orthodox
  - Confucianism
  - Hinduism
  - Jainism
  - Jehovah's Witnesses
  - Judaism
  - Islam
  - Rastafarianism
  - Roman Catholic
  - Sikhism
  - Spiritual
  - Unitarianism
  - Zoroastrianism
  - Other (Please specify):
- 
- Prefer not to answer
  - Do not know

**6. How important or unimportant is faith, religion or spirituality to you, personally, in your everyday life?**

- Very unimportant
- Somewhat unimportant
- Neutral/No opinion
- Somewhat important
- Very Important

**7. What is your current role at the hospital?**

- \_\_\_\_\_

**8. Number of years in your current role: \_\_\_\_\_**

**9. Number of years working as a hospital administrator: \_\_\_\_\_**

**10. Approximately how much of your job is clinical duties (as a percentage): \_\_\_\_\_**

## Physician Demographic Form

1. What is your age: \_\_\_\_\_
2. What is your gender: \_\_\_\_\_
  - Female
  - Intersex
  - Male
  - Trans – Female to Male
  - Trans – Male to Female
  - Other (please specify): \_\_\_\_\_
  - Prefer not to answer
  - Don't know
3. Which of the following best describes your racial or ethnic group? Check ONE only.
  - Asian – East (e.g., Chinese, Japanese, Korean)
  - Asian – South (e.g., Indian, Pakistani, Sri Lankan)
  - Asian – South East (e.g., Malaysian, Filipino, Vietnamese)
  - Black – African (e.g., Ghanaian, Kenyan, Somali)
  - Black – Caribbean (e.g., Barbadian, Jamaican)
  - Black – North American (e.g., Canadian, American)
  - First Nations
  - Indian – Caribbean (e.g., Guyanese with origins in India)
  - Indigenous/Aboriginal – *not included elsewhere*
  - Inuit
  - Latin American (e.g., Argentinean, Chilean, Salvadoran)
  - Métis
  - Middle Eastern (e.g., Egyptian, Iranian, Lebanese)
  - White – European (e.g., English, Italian, Portuguese, Russian)
  - Mixed heritage (e.g., Black – African and White – North American) (Please specify): \_\_\_\_\_
  - Other(s) (Please specify): \_\_\_\_\_
  - Prefer not to answer
  - Do not know
4. What is your first language (Mother tongue)?
  - a. English
  - b. French
  - c. Other (Please specify): \_\_\_\_\_
5. What is your religious or spiritual affiliation? Check ONE only.

|                                                                          |                                           |
|--------------------------------------------------------------------------|-------------------------------------------|
| <input type="radio"/> I do not have a religious or spiritual affiliation | <input type="radio"/> Native Spirituality |
| <input type="radio"/> Animism or Shamanism                               | <input type="radio"/> Pagan               |
| <input type="radio"/> Atheism                                            | <input type="radio"/> Protestant          |
| <input type="radio"/> Baha'i Faith                                       | <input type="radio"/> Rastafarianism      |
| <input type="radio"/> Buddhism                                           | <input type="radio"/> Roman Catholic      |

- Christian – *not included elsewhere*
  - Christian Orthodox
  - Confucianism
  - Hinduism
  - Jainism
  - Jehovah's Witnesses
  - Judaism
  - Islam
  - Sikhism
  - Spiritual
  - Unitarianism
  - Zoroastrianism
  - Other (Please specify): \_\_\_\_\_
- 
- Prefer not to answer
  - Do not know

**6. How important or unimportant is faith, religion or spirituality to you, personally, in your everyday life?**

- Very unimportant
- Somewhat unimportant
- Neutral/No opinion
- Somewhat important
- Very Important

**7. What is your type of physician are you (select all that are applicable)?**

- Critical Care
- Internal Medicine
- Emergency Medicine
- Other (please specify): \_\_\_\_\_

**8. (If applicable) What type of ICU do you work in?:**

- Medical/Surgical
- Trauma
- Neurological Intensive Care
- Cardiovascular Intensive Care
- Cardiac Surgery
- Other: \_\_\_\_\_

**9. Number of years working in healthcare:** \_\_\_\_\_

**10. Number of years in your current role:** \_\_\_\_\_

**11. Approximately how much of your job is clinical duties (as a percentage):** \_\_\_\_\_

## Qualitative Interview Guide for Hospital Administrators

This interview session will be audio recorded.

The session will take between 30 and 60 minutes to complete.

### Questions

- Describe your role as a hospital administrator?
- How are you involved with implementation planning?
  - Are you involved at the hospital, regional, or provincial level?
  - What has been useful?
  - Are there any gaps in that planning?
  - Do you feel prepared for initiating the ESoC? Why or why not?
  - What would help you feel more prepared?
- What is your familiarity with the Triage ESoC?
- What is your overall impression or perception of the Triage ESoC?
  - How have the different waves affected your perception of the Triage ESoC?
- What has been the reaction of your physicians and hospital staff to the Triage ESoC?
- How do you think implementing the ESoC will affect the healthcare professionals involved?
  - How might it affect physicians? Nurses? Social workers? Other hospital staff?
  - Prompt: negative psychological impacts, such as moral injury or emotional exhaustion
- Has your hospital provided supports to you or non-physician staff regarding the use of the ESoC? / Does your hospital intend to provide additional supports to physicians and other hospital staff who might intend to implement the ESoC in the event of a surge?
- Have you received any feedback from patients or caregivers regarding the potential implementation of the Triage ESoC?
  - [If no] – Why haven't patients or caregivers been included in the implementation planning process?
- What aspects of the Triage ESoC do you think will be most challenging to implement logistically or operationally?
  - Prompt: time to complete
  - Prompt: how to get people into beds after STMR is done
- What aspects of the Triage ESoC do you think will be least challenging to implement logistically or operationally?
  - Prompt: assessing STMR
  - Prompt: communication with the family
- Do you have concerns about liability protection surrounding the use of the ESoC? Can you describe these?
  - Did you have concerns about the medicolegal consequences of implementing it?

- Do you have ethical concerns about implementing the Triage ESoC? Can you describe these?
- How do you hope the process of ICU resource allocation could be improved, based on this experience during the COVID-19 pandemic?
  - How do you think the Triage ESoC could be improved?
- Do you have any other thoughts you would like to share regarding your perceptions the Triage ESoC?

## Qualitative Interview Guide for Physicians

This interview session will be audio recorded.

The session will take between 30 and 60 minutes to complete.

### Questions

- Describe your role in the hospital?
- How are you involved with implementation planning?
  - Are you involved at the hospital, regional, or provincial level?
  - What has been useful?
  - Are there any gaps in that planning?
  - Do you feel prepared for initiating the ESoC? Why or why not?
  - What would help you feel more prepared?
- What is your familiarity with the Triage ESoC?
- What is your overall impression or perception of the Triage ESoC?
  - How have the different waves affected your perception of the Triage ESoC?
- What has been the reaction of your physicians and hospital staff to the Triage ESoC?
- How do you think implementing the ESoC will affect the healthcare professionals involved?
  - How might it affect physicians? Nurses? Social workers? Other hospital staff?
  - Prompt: negative psychological impacts, such as moral injury or emotional exhaustion
- Has your hospital provided supports to you or non-physician staff regarding the use of the ESoC? / Does your hospital intend to provide additional supports to physicians and other hospital staff who might intend to implement the ESoC in the event of a surge?
- Have you received any feedback from patients or caregivers regarding the potential implementation of the Triage ESoC?
  - [If no] – Why haven't patients or caregivers been included in the implementation planning process?
- What will be your function in doing the STMR (short-term mortality risk assessment)?
  - How do you feel about this role?
- What aspects of the Triage ESoC do you think will be most challenging to implement logistically or operationally?
  - Prompt: timing to implement
  - Prompt: developing mastery over the process
  - Prompt: how to get people into beds after STMR is done
- What aspects of the Triage ESoC do you think will be easiest to implement logistically or operationally?
  - Prompt: assessing STMR
  - Prompt: communication with the family

- Do you have concerns about coming to an agreement with the other assessor regarding the Triage ESoC?
- Given a hypothetical circumstance that a patient was not prioritized for critical care at any level of triage, can you please tell us some of your concerns regarding communicating this decision to the patient and/or substitute decision-maker?
- Do you have concerns about liability protection surrounding the use of the ESoC? Can you describe these?
  - Did you have concerns about the medicolegal consequences of implementing it?
- Do you have ethical concerns about implementing the Triage ESoC? Can you describe these?
- How do you hope the process of ICU resource allocation could be improved, based on this experience during the COVID-19 pandemic?
  - How do you think the Triage ESoC could be improved?
- How has the pandemic changed how you make decisions regarding whether to offer someone admission to the ICU/critical care/ventilator?
- Do you have any other thoughts you would like to share regarding your perceptions of the Triage ESoC?
